# Supplementary material
Source: HighWire-hosted journal article supplement (https://bmjopen.bmj.com/content/12/7/e059900)
Supplement: inline-supplementary-material-1 [file inline-supplementary-material-1.pdf]

DO NOT fill in (for encoding purpose only)

Rec :

**Evaluation of missed vaccination opportunities: child questionnaire**District: ..... Team: ..... N° child: 

Center: ..... Date: ..... / ..... / ..... Age of the child: ..... years ..... months

1) Do you have a vaccination card or a health book for the child?

 No  Yes → Did you bring it today?  No  Yes2) What was the **main** purpose of your visit to the health center today? (One answer only)

|                          |                       |                          |                 |
|--------------------------|-----------------------|--------------------------|-----------------|
| <input type="checkbox"/> | Curative consultation | <input type="checkbox"/> | Vaccination     |
| <input type="checkbox"/> | MCH consultation      | <input type="checkbox"/> | Feeding program |
| <input type="checkbox"/> | Accompanying an adult | <input type="checkbox"/> | Other: .....    |

3) Vaccination status:

Write the **dates** (dd/mm/yy) mentioned in the health book **and circle it** if vaccine given today.If the history of vaccination is only confirmed orally by the caretaker, write **H**.**Cross** the box (X) for the missing dose of vaccine that could have been given today.

|                  | Dose 0 | Dose 1 | Dose 2 | Dose 3 |
|------------------|--------|--------|--------|--------|
| BCG              |        |        |        |        |
| HepB birth dose  |        |        |        |        |
| Polio            |        |        |        |        |
| DTP - HepB - Hib |        |        |        |        |
| PCV 13           |        |        |        |        |
| Rota             |        |        |        |        |
| Measles          |        |        |        |        |
| Yellow fever     |        |        |        |        |

4) Was the child eligible for a vaccine today?

 No → Do you know the date of your next vaccination?  No  Yes → **END** Yes → Did the child present with a true contra-indication to the vaccination today? No  Yes → **GO TO QUESTION 6**5) Did the child receive **all** vaccines required today? Yes(If X in box)  No → Would you have accepted the vaccination today if proposed? Yes  No → Why? .....

→ Reason(s) for not receiving all vaccines today? (One answer only)

|                          |                       |                          |                        |
|--------------------------|-----------------------|--------------------------|------------------------|
| <input type="checkbox"/> | Out of stock          | <input type="checkbox"/> | No vaccinator          |
| <input type="checkbox"/> | Waiting time too long | <input type="checkbox"/> | Not enough information |
| <input type="checkbox"/> | Don't know the reason | <input type="checkbox"/> | Other: .....           |

6) Did you get an appointment for your next vaccination?  No  Yes**THANK YOU FOR YOUR PARTICIPATION!**

Missed Immunization Opportunity – Child questionnaire
