# Supplementary material
Source: HighWire-hosted journal article supplement (https://bmjopen.bmj.com/content/12/7/e059900)
Supplement: inline-supplementary-material-2 [file inline-supplementary-material-2.pdf]

**Supplementary Table 1. Characteristics of interviewed children by presentation of vaccination card. MSF-supported health facilities (2011-2015)**

|                        | Total<br>N  | Presentation of vaccination card <sup>d</sup> |             |             |             | <i>p</i> value      |
|------------------------|-------------|-----------------------------------------------|-------------|-------------|-------------|---------------------|
|                        |             | No                                            |             | Yes         |             |                     |
|                        | N           | N                                             | %           | N           | %           |                     |
| <b>Age groups</b>      |             |                                               |             |             |             |                     |
| <12 m                  | 2742        | 906                                           | 33.0        | 1836        | 67.0        |                     |
| 12-23 m                | 1263        | 665                                           | 52.7        | 598         | 47.4        |                     |
| 24-59 m                | 1050        | 746                                           | 71.1        | 304         | 29.0        | <0.001 <sup>a</sup> |
| <b>Eligible</b>        |             |                                               |             |             |             |                     |
| No                     | 2276        | 1258                                          | 55.3        | 1018        | 44.7        |                     |
| Yes                    | 2779        | 1059                                          | 38.1        | 1720        | 61.9        | <0.001 <sup>b</sup> |
| <b>MOV<sup>c</sup></b> |             |                                               |             |             |             |                     |
| No                     | 2985        | 1358                                          | 45.5        | 1627        | 54.5        |                     |
| Yes                    | 2070        | 959                                           | 46.3        | 1111        | 53.7        | 0.558 <sup>b</sup>  |
| <b>Total</b>           | <b>5055</b> | <b>2317</b>                                   | <b>45.8</b> | <b>2738</b> | <b>54.2</b> |                     |

% Row percentages

<sup>a</sup> Fisher exact test

<sup>b</sup> Chi square test

<sup>c</sup> MOV over the eligible children without contraindication for vaccination

<sup>d</sup> Vaccination history was obtained by presentation of vaccination card or oral history.

**Supplementary Table 2. Children who visited MSF-supported health facilities by country (2011-2015)**

| Country                          | Children with vaccination card |                | Eligible with no contraindication |                | MOV         |                |
|----------------------------------|--------------------------------|----------------|-----------------------------------|----------------|-------------|----------------|
|                                  | n                              | % <sup>a</sup> | n                                 | % <sup>b</sup> | n           | % <sup>c</sup> |
| Afghanistan                      | 33                             | 1.2            | 11                                | 33.3           | 8           | 72.7           |
| Democratic Republic of the Congo | 79                             | 2.9            | 41                                | 51.9           | 26          | 63.4           |
| Mauritania                       | 244                            | 9.0            | 158                               | 64.8           | 118         | 74.7           |
| Niger                            | 1888                           | 69.8           | 1073                              | 56.8           | 851         | 79.3           |
| Pakistan                         | 15                             | 0.6            | 8                                 | 53.3           | 1           | 12.5           |
| South Sudan                      | 447                            | 16.5           | 397                               | 88.8           | 75          | 18.9           |
| <b>Total</b>                     | <b>2706</b>                    | <b>100.0</b>   | <b>1688</b>                       | <b>62.4</b>    | <b>1079</b> | <b>63.9</b>    |

<sup>a</sup> Column percentage

<sup>b</sup> Row percentage among children with vaccination card

<sup>c</sup> Row percentage among eligible children without contraindication

**Supplementary Table 3. Characteristics of children with MOV irrespective of the possession of vaccination card. MSF-supported health facilities (2011-2015)**

|              | MOV <sup>a</sup> |             |             |             | p value            |
|--------------|------------------|-------------|-------------|-------------|--------------------|
|              | No               |             | Yes         |             |                    |
|              | N                | %           | N           | %           |                    |
| Age groups   |                  |             |             |             |                    |
| <12 m        | 588              | 33.2        | 1182        | 66.8        |                    |
| 12-23 m      | 66               | 11.6        | 504         | 88.4        |                    |
| 24-59 m      | 55               | 12.5        | 384         | 87.5        | 0.001 <sup>b</sup> |
| <b>Total</b> | <b>709</b>       | <b>25.5</b> | <b>2070</b> | <b>74.5</b> |                    |

<sup>a</sup> MOV over the eligible children without contraindication for vaccination

<sup>b</sup> Fisher
